# Supplementary material for: Effects of Adiponectin on Glucose Metabolism in the Hepatopancreas of Grass Carp (Ctenopharyngodon idella)
Source: Hindawi journal article supplement (doi:10.1155/2022/5699931), 2022-01-31
Supplement: f2 [file 5699931.f2.pdf]

1 G GCA TTT CCA AAG CCA TTT GCA TCA AGA AGT TTA GAT TAG GGA TTA GGT 49  
50 TAT AAT ATT GTG TTC TAA TTC ATG ACA AAA AGT CAA ACA ATT CAC AAT TTC TAA AGT GTG 109  
110 TCA TCT CAA GTT TTA TAT AAG ATG TAC AAT ACA TAG TAT TAG TTT ATG TAG CAG GAT AAC 169  
170 ATG GTT ATT AAA TTC TTG AAT ATT TCA TTT GAC ATC AGT ATG ACG CTA CTG TGG AAG ATC 229  
1 M V I K F L N I S F D I S M T L L W K I 20  
  
230 TTA TTG GGA ATC ATT CTC ATT GGG CGA CTT GGT CAA GGT CAA GAC CTA TTA GAG GAA TCT 289  
21 L L G I I L I G R L G Q G Q D L L E E S 40  
  
290 TTA GAG CGA ATA GCA GTG GAT GAA GGG GCT GAG GAG GGA GGA GAA GAG GTT GAA GAG CCT 349  
41 L E R I A V D E G A E E G G E E V E E P 60  
  
350 GAG GGT CCA GGG GCA GAT GCC ACT CAA CCT GAT GAT AGA CAG CCA TGT GCC ATG TGG ATG 409  
61 E G P G A D A T Q P D D R Q P C A M W M 80  
  
410 GGA GGC GTT CCT GGT ACA CCT GGG CAC AGT GGA AAA CCT GGG AGA GAT GGC AGA GAT GGG 469  
81 G G V P G T P G H S G K P G R D G R D G 100  
  
470 CAT GAT GGA CCG AGG GGC GAG AAA GGA GAT AAA GGT GAA GCA GGT GAG AAA GGA GAT ACT 529  
101 H D G P R G E K G D K G E A G E K G D T 120  
  
530 GGA CAG AAG GGG GAT GTC GGT CCT GCT GGG CCG AGA GGC TTT CCT GGA AAC CCA GGT CTG 589  
121 G Q K G D V G P A G P R G F P G N P G L 140  
  
590 AAA GGT GCC CGT GGG GAC AGT GCC TTG TCT TAC CAT TCA GCC TTT AGC GTA GGT CTC AGT 649  
141 K G A R G D S A L S Y H S A F S V G L S 160  
  
650 GAA CTT GTT CCC GCC ACT AAC TTT CCA ATC CGC TTC AAC AAG TTC TTC TAC AAC GAC CAG 609  
161 E L V P A T N F P I R F N K F F Y N D Q 180  
  
710 CAC CAC TAT GAT GAT GTT TCT GGA AAG TTC CGC TGC GTT CTA CCA GGG GTG TAC TTC TTC 769  
181 H H Y D D V S G K F R C V L P G V Y F F 200  
  
770 ACG TAT CAT CTA ACC GTC TAC ACT AAA GAT GCT AAA GTC AGT CTC TAC ATG AAT GAC AAG 829  
201 T Y H L T V Y T K D A K V S L Y M N D K 220  
  
830 GCT ATC ATG TTC ACC TAT GAC CAG TAC CAG GAA ACC AAT GTG GAT CAG GCA TCA GGT TCT 889  
221 A I M F T Y D Q Y Q E T N V D Q A S G S 240  
  
890 GTT ATC TTG CGT TTG GAG GCA GGA GAT GAG ATA TGG CTG CAG GTC TAT GGA GAT GAG GGG 949  
241 V I L R L E A G D E I W L Q V Y G D E G 260  
  
950 TTT GGG GGA GTG TAT GCA GAT AAC ACC AAC GAC TCC ACC TTT TCC GGT TTC CTC CTG TAT 1009  
261 F G G V Y A D N T N D S T F S G F L L Y 280  
  
1010 CCT GCA ATT CCT GCT CCT GCA CAG AGA CAT TGA CAA TAT CTT AAA TCA GGG CTA TCG GGC 1069  
281 P A I P A P A Q R H \* 290  
  
1070 TTG GTT CGT GGG GGC CCG CAG CCC TGG AGA GTT TGG TTC GGC CCT GGT TGA ATC TAC ACT 1129  
1130 CTA GGA GAG GTG CTG GGT TGT TTC GGC CCA GGT TTG GGT CAG GTG TGG ACG GAC CTA GCC 1189  
1190 GTT GGG TTA AAA GTT TAA TTA AAG AGT TTG CCC CAA CGG CTG GAT TTG TCC GTG TTT GGC 1249  
1250 CCG AAT TTG GGT TGG AAC AAC CCA GCG TTT TTT GGA GTG TAC ATT TGG TTG GGG TCG GGG 1309  
1310 CTG GGC TCT GCA GGG TTG TGG GCC TCC ATG AAC TAA GTT TGA ACT AAG TTT GTG TGT TGA 1369  
1370 AGC AGG GTT GGG ACT AAA CTT TGT AGG ACT GTG GTC CTC CAG GAA TTG AGT TTA ACA CCC 1429  
1430 CTG TCC TAA ATA AAT CAA TTT GGC TAT ATT TAA AAA AAA AAA AAA AAA AA 1479
