# Supplementary material for: Effects of Adiponectin on Glucose Metabolism in the Hepatopancreas of Grass Carp (Ctenopharyngodon idella)
Source: Hindawi journal article supplement (doi:10.1155/2022/5699931), 2022-01-31
Supplement: f4 [file 5699931.f4.docx]

**(A) MS analysis of 30 kDa adiponectin B protein band in SDS-PAGE**

***Search parameters***

| Type of search | : | MS/MS Ion Search |
| --- | --- | --- |
| Enzyme | : | Trypsin |
| Fixed modifications | : | Carbamidomethyl (C) |
| Variable modifications | : | Acetyl (Protein N-term), Deamidated (NQ), Oxidation (M) |
| Mass values | : | Monoisotopic |
| Protein mass | : | Unrestricted |
| Peptide mass tolerance | : | ± 20 ppm |
| Fragment mass tolerance | : | ± 0.05 Da |
| Max missed cleavages | : | 1 |
| Instrument type | : | ESI-QUAD-TOF |
| Number of queries | : | 551 |

***Legend***

**Protein Family Summary**

Filter: Significance threshold: *p* < 0.05 Max. number of families: AUTO

Ions score or expect cut-off: 0 Dendrograms cut at: 0

**Decoy search summary**

|  | **Score** | **Mass** | **Matches** | **Sequences** | **emPAI** |
| --- | --- | --- | --- | --- | --- |
| [P2020011885-20200410](http://pc/mascot/cgi/protein_view.pl?file=..%2Fdata%2F20200412%2FF009025.dat;_msresflags=3138;_msresflags2=10;ave_thresh=27;db_idx=1;hit=P2020011885-20200410;px=1) | 4977 | 30324 | 188 (160) | 11 (10) | 3.77 |

***Protein View***

**Match to: P2020011885-20200410 Score: 4977**

Nominal mass (Mr): **30324**; Calculated pI value: **4.91**

NCBI BLAST search of P2020011885-20200410 against nr

Unformatted sequence string for pasting into other applications

Fixed modifications: Carbamidomethyl (C)

Variable modifications: Acetyl (Protein N-term),Deamidated (NQ),Oxidation (M)

Cleavage by Trypsin: cuts C-term side of KR unless next residue is P

Sequence Coverage: **62%**

Matched peptides shown in **Bold Red**

**1** M**ASMTGGQQM GRGSEFHHHH HHQDLLEESL ER**IAVDEGAE EGGEEVEEPE

**51** GPGADATQPD DR**QPCAMWMG GVPGTPGHSG KPGR**DGRDGH DGPRGEKGDK

**101** GEAGEK**GDTG QKGDVGPAGP RGFPGNPGLK** GARGDSALSY HSAFSVGLSE

**151** LVPATNFPIR **FNKFFYNDQH HYDDVSGKFR** CVLPGVYFFT YHLTVYTKDA

**201** K**VSLYMNDKA IMFTYDQYQE TNVDQASGSV ILRLEAGDEI WLQVYGDEGF**

**251 GGVYADNTND STFSGFLLYP AIPAPAQR**H

**(B) MS analysis of 60 kDa adiponectin B protein band in SDS-PAGE**

***Search parameters***

| Type of search | : | MS/MS Ion Search |
| --- | --- | --- |
| Enzyme | : | Trypsin |
| Fixed modifications | : | Carbamidomethyl (C) |
| Variable modifications | : | Acetyl (Protein N-term), Deamidated (NQ), Oxidation (M) |
| Mass values | : | Monoisotopic |
| Protein mass | : | Unrestricted |
| Peptide mass tolerance | : | ± 20 ppm |
| Fragment mass tolerance | : | ± 0.05 Da |
| Max missed cleavages | : | 1 |
| Instrument type | : | ESI-QUAD-TOF |
| Number of queries | : | 1,146 |

***Legend***

**Protein Family Summary**

Filter: Significance threshold: *p* < 0.05 Max. number of families: AUTO

Ions score or expect cut-off: 0 Dendrograms cut at: 0

**Decoy search summary**

|  | **Score** | **Mass** | **Matches** | **Sequences** | **emPAI** |
| --- | --- | --- | --- | --- | --- |
| P2020011885-20200410 | 6663 | 30324 | 234 (196) | 13 (12) | 7.91 |

**Match to: P2020011885-20200410 Score: 6663**

Nominal mass (Mr): **30324**; Calculated pI value: **4.91**

NCBI BLAST search of P2020011885-20200410 against nr

Unformatted sequence string for pasting into other applications

Fixed modifications: Carbamidomethyl (C)

Variable modifications: Acetyl (Protein N-term),Deamidated (NQ),Oxidation (M)

Cleavage by Trypsin: cuts C-term side of KR unless next residue is P

Sequence Coverage: **82%**

Matched peptides shown in **Bold Red**

**1** M**ASMTGGQQM GRGSEFHHHH HHQDLLEESL ERIAVDEGAE EGGEEVEEPE**

**51 GPGADATQPD DRQPCAMWMG GVPGTPGHSG KPGR**DGRDGH DGPRGEKGDK

**101** GEAGEK**GDTG QKGDVGPAGP RGFPGNPGLK** GAR**GDSALSY HSAFSVGLSE**

**151 LVPATNFPIR FNKFFYNDQH HYDDVSGK**FR CVLPGVYFFT YHLTVYTKDA

**201** K**VSLYMNDKA IMFTYDQYQE TNVDQASGSV ILRLEAGDEI WLQVYGDEGF**

**251 GGVYADNTND STFSGFLLYP AIPAPAQR**H
