# Supplementary figures and images for: Effects of Adiponectin on Glucose Metabolism in the Hepatopancreas of Grass Carp (Ctenopharyngodon idella)
Source: Hindawi journal article supplement (doi:10.1155/2022/5699931), 2022-01-31

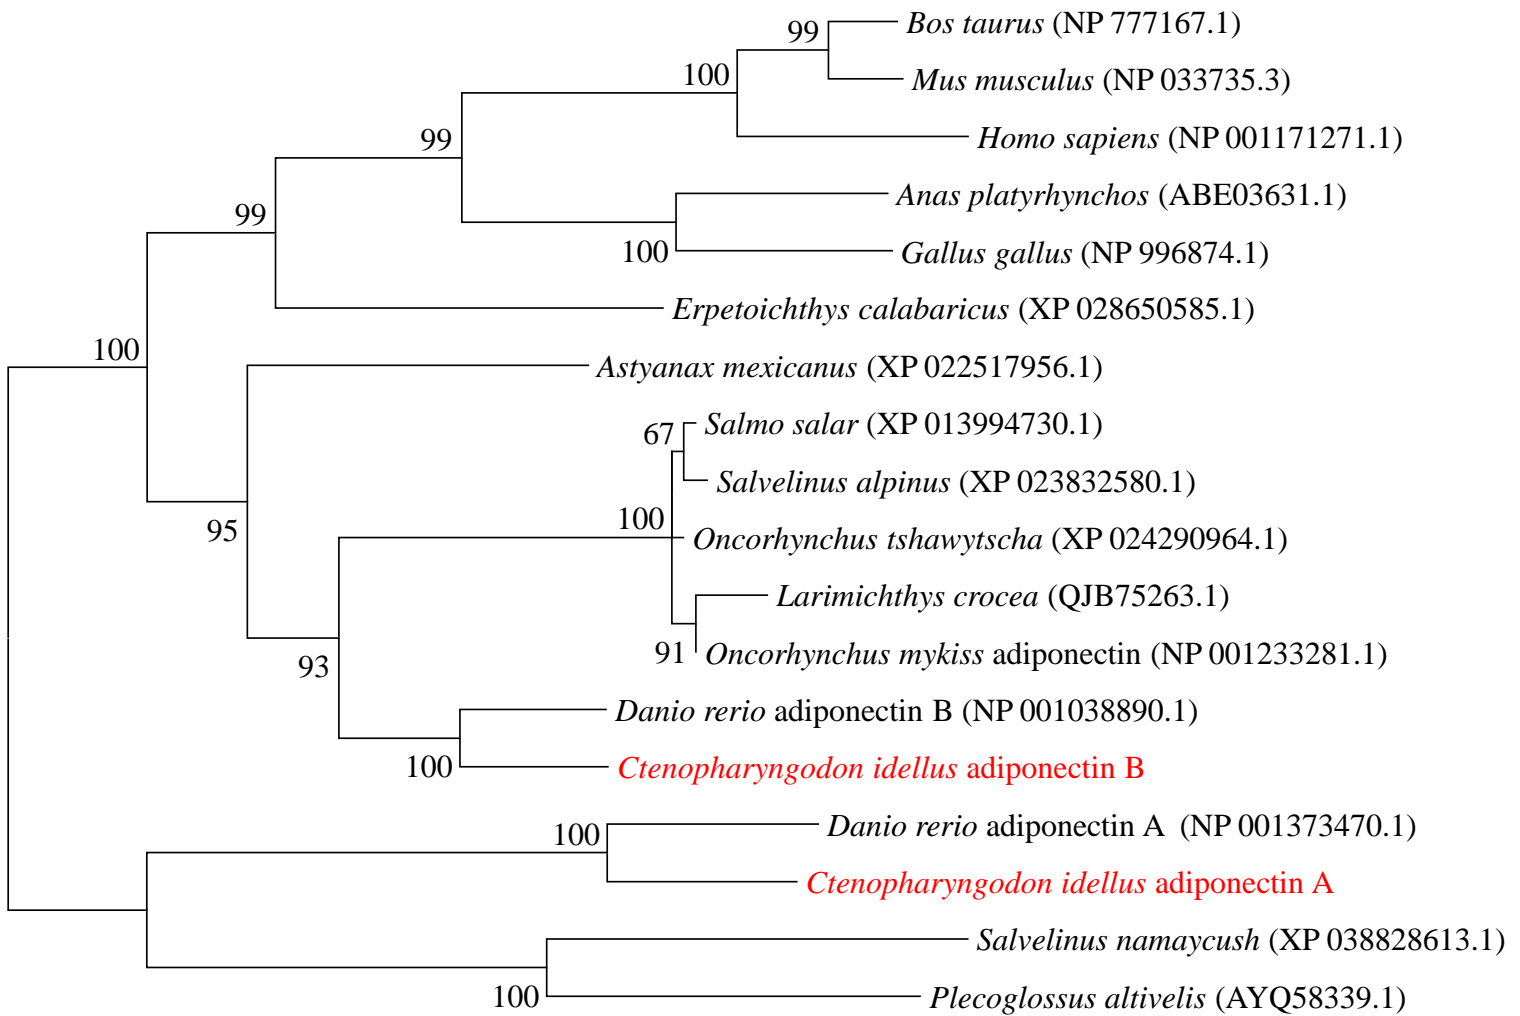

0.050

Supplement: f3 [file 5699931.f3.pdf]
